# Supplementary figures and images for: Bioinspired green-synthesized silver nanoparticles:in vitrophysicochemical, antibacterial, biofilm inhibitory, genotoxicity, antidiabetic, antioxidant, and anticoagulant performance
Source: Royal Society of Chemistry journal article supplement (doi:10.1039/d3ma00089c), 2023-01-01

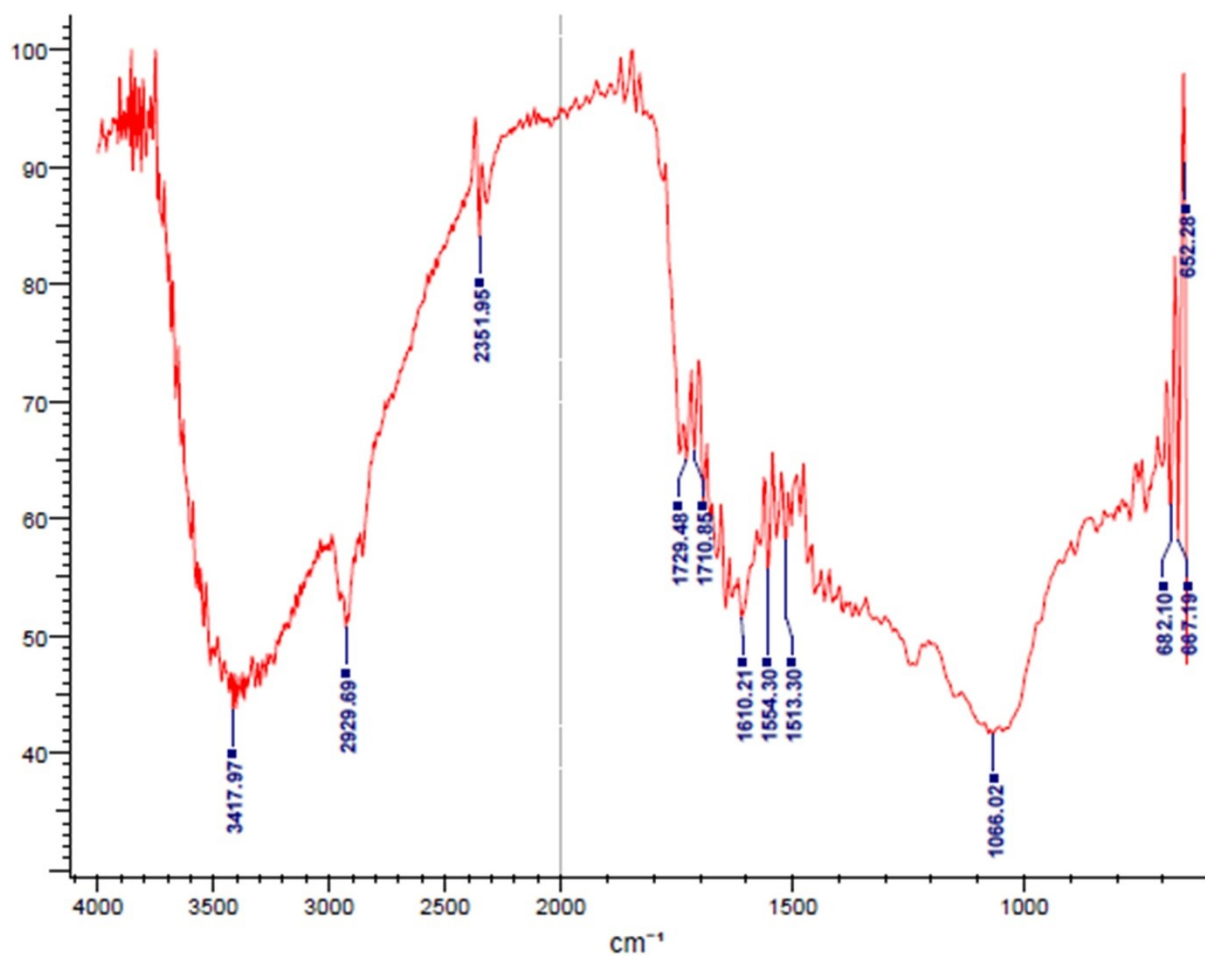

**Figure 1S.** FT-IR spectrum of aqueous seed extract of *Pimpinella anisum*.

Supplement: d3ma00089c1.pdf [file d3ma00089c1.pdf]
